# Supplementary material for: Use of Contraception and Attitudes towards Contraceptive Use in Swedish Women - A Nationwide Survey
Source: PLoS One. 2015 May 20;10(5):e0125990. doi: 10.1371/journal.pone.0125990 (PMC4439158; doi:10.1371/journal.pone.0125990)
Supplement: S3 Diagram — (XLSX) [file pone.0125990.s003.xlsx]

## Sheet: Blad1
Unintended pregancies
Outcome	UP1 (n=220)	UP2 (n=56)	UP3 (n=26)	UP4 (n=7)	UP5 (n=4)	UP6 (n=3)
Birth	40.9	53.8	57.7	57.1	50	33.3
TOP	43.6	36.9	26.9	28.6	25	66.7
Miscarriage	12.7	7.7	15.4	14.3	25	0
Ectopic	1.4	1.5	0	0	0	0
Missing	1.4	0	0	0	0	0
